# Supplementary material for: Landscape of cancer associated EpCAM mutations: molecular modeling, Predictive Insights and Impact on Patient Survival
Source: Research Square preprint supplement (doi:10.21203/rs.3.rs-6174915/v1), 2025-03-12
Supplement: Supplementary file 1 [file Data Figure S2A All Mutation Data.xlsx]

## Sheet: Sheet1
Study of Origin	Sample ID	Cancer Type Detailed	Protein Change	Mutation Type	Copy #	Allele Freq (T)	# Mut in Sample
Hepatocellular Carcinoma (MSK, Clin Cancer Res 2018)	P-0020987-T01-IM6	Hepatocellular Carcinoma	A2E	Missense	Diploid	0.31	7
Brain Tumor PDXs (Mayo Clinic, Clin Cancer Res 2020)	Mayo-PDX-Sarkaria-200	Glioblastoma Multiforme	A2V	Missense	Diploid		4235
Esophageal Adenocarcinoma (TCGA, PanCancer Atlas)	TCGA-L5-A8NI-01	Esophageal Adenocarcinoma	MSH2-EPCAM Fusion	Fusion	Amp		189
Esophageal Adenocarcinoma (TCGA, PanCancer Atlas)	TCGA-LN-A5U7-01	Esophageal Squamous Cell Carcinoma	MSH2-EPCAM Fusion	Fusion	Diploid		106
Stomach Adenocarcinoma (TCGA, PanCancer Atlas)	TCGA-CD-8533-01	Stomach Adenocarcinoma	MSH2-EPCAM Fusion	Fusion	Diploid		100
Lung Squamous Cell Carcinoma (TCGA, PanCancer Atlas)	TCGA-22-4604-01	Lung Squamous Cell Carcinoma	P3S	Missense	Gain	0.25	223
Thyroid Carcinoma (TCGA, Firehose Legacy)	TCGA-EM-A2P2-01	Follicular Thyroid Cancer	P4L	Missense	Diploid	0.67	26
Disparities in metastatic colorectal cancer between Africans and Americans (MSK, 2020)	s_PK_crc_135_T	Colorectal Adenocarcinoma	P4Rfs*33	FS del	Diploid	0.37	65
Head and Neck Squamous Cell Carcinoma (TCGA, Nature 2015)	TCGA-CR-6472-01	Head and Neck Squamous Cell Carcinoma	Q5*	Nonsense	Diploid	0.62	414
Glioma (MSK, Clin Cancer Res 2019)	P-0015044-T01-IM6	Anaplastic Astrocytoma	Q5*	Nonsense	Amp	0.99	4
Head and Neck Squamous Cell Carcinoma (TCGA, PanCancer Atlas)	TCGA-CR-6472-01	Head and Neck Squamous Cell Carcinoma	Q5*	Nonsense	Diploid	0.64	422
Endometrial Carcinoma MSI (MSK, Clin Cancer Res 2022)	MMR_EC105	Endometrial Carcinoma	Q5Afs*26	FS ins			31
Melanoma (MSK, Clin Cancer Res 2021)	P-0015415-T01-IM6	Melanoma of Unknown Primary	L7F	Missense	Diploid	0.46	91
Lung Adenocarcinoma (MSK Mind,Nature Cancer 2022)	P-0021231-T01-IM6	Lung Squamous Cell Carcinoma	A8G	Missense	Diploid	0.25	8
Urothelial Carcinoma (Cornell/Trento, Nat Gen 2016)	WCM137_2	Bladder Urothelial Carcinoma	A8G	Missense	Gain		454
Uterine Corpus Endometrial Carcinoma (TCGA, PanCancer Atlas)	TCGA-FI-A3PX-01	Uterine Serous Carcinoma/Uterine Papillary Serous Carcinoma	EPCAM-ABCG8 Fusion	Fusion	Amp		87
Colorectal Cancer (MSK, Gastroenterology 2020)	P-0015208-T01-IM6	Colon Adenocarcinoma	L11R	Missense	Diploid	0.19	7
Prostate Adenocarcinoma (MSK, Clin Cancer Res. 2022)	P-0040739-T01-IM6	Prostate Adenocarcinoma	A15L	Missense	Diploid	0.23	6
Glioma (MSK, Clin Cancer Res 2019)	P-0019244-T01-IM6	Glioblastoma Multiforme	A23V	Missense	Diploid	0.43	453
Bladder Cancer (MSK, Cell Reports 2022)	P-0002472-T01-IM3	Bladder Urothelial Carcinoma	Q24E	Missense	Diploid	0.22	3
Bladder Cancer (MSK/TCGA, 2020)	MSKCC-0754_NR	Bladder Urothelial Carcinoma	Q24E	Missense			104
Melanoma (MSK, Clin Cancer Res 2021)	P-0029504-T01-IM6	Cutaneous Melanoma	X26_splice	Splice	Diploid	0.23	181
Disparities in metastatic colorectal cancer between Africans and Americans (MSK, 2020)	s_PK_crc_112_T	Colorectal Adenocarcinoma	C29*	FS del	Diploid	0.09	67
Colorectal Adenocarcinoma (TCGA, PanCancer Atlas)	TCGA-AA-3811-01	Colon Adenocarcinoma	E30V	Missense	Gain	0.07	1916
Bladder Cancer (MSK, Cell Reports 2022)	P-0050117-T01-IM6	Bladder Urothelial Carcinoma	Y32H	Missense	Diploid	0.17	11
Brain Tumor PDXs (Mayo Clinic, Clin Cancer Res 2020)	Mayo-PDX-Sarkaria-200	Glioblastoma Multiforme	V36I	Missense	Diploid		4235
Gallbladder Cancer (MSK, 2022)	P-0008494-T01-IM5	Mixed Adenocarcinoma and Neuroendocrine Carcinoma	C38Y	Missense	Diploid	0.44	9
Breast Cancer (MSK, Cancer Cell 2018)	P-0014828-T01-IM6	Breast Invasive Ductal Carcinoma	F39S	Missense	Diploid	0.1	18
Colorectal Adenocarcinoma (DFCI, Cell Reports 2016)	coadread_dfci_2016_207430	Colorectal Adenocarcinoma	V40G	Missense			1624
Ovarian Serous Cystadenocarcinoma (TCGA, PanCancer Atlas)	TCGA-24-1424-01	Serous Ovarian Cancer	NUP42-EPCAM Fusion	Fusion	Amp		69
Skin Cutaneous Melanoma (TCGA, PanCancer Atlas)	TCGA-EE-A2MR-06	Cutaneous Melanoma	R44C	Missense	Gain	0.32	2917
Cutaneous Squamous Cell Carcinoma (MD Anderson, Clin Cancer Res 2014)	CSCC-49-T	Cutaneous Squamous Cell Carcinoma	R44C	Missense		0.26	3348
Glioblastoma Multiforme (TCGA, PanCancer Atlas)	TCGA-14-0865-01	Glioblastoma Multiforme	R44H	Missense	Diploid	0.4	68
Liver Hepatocellular Carcinoma (TCGA, Firehose Legacy)	TCGA-ES-A2HT-01	Hepatocellular Carcinoma	Q47*	Nonsense	Diploid	0.04	705
Recurrent and Metastatic Head & Neck Cancer (MSK, JAMA Oncol 2016)	P-0001082-T01-IM3	Oral Cavity Squamous Cell Carcinoma	S50L	Missense	Diploid	0.17	25
Uterine Corpus Endometrial Carcinoma (TCGA, PanCancer Atlas)	TCGA-BG-A0VW-01	Uterine Endometrioid Carcinoma	G52V	Missense	Diploid	0.03	435
Uterine Corpus Endometrial Carcinoma (TCGA, PanCancer Atlas)	TCGA-FI-A2D0-01	Uterine Endometrioid Carcinoma	A53T	Missense	Diploid	0.35	6448
Esophageal/Stomach Cancer (MSK, 2020)	P-0036989-T01-IM6	Adenocarcinoma of the Gastroesophageal Junction	K61T	Missense	Diploid	0.11	7
Pan-Lung Cancer (TCGA, Nat Genet 2016)	TCGA-78-8662-01	Lung Adenocarcinoma	X62_splice	Splice	Gain	0.49	979
Colorectal Cancer (MSK, Gastroenterology 2020)	P-0019949-T01-IM6	Rectal Adenocarcinoma	X62_splice	Splice	Diploid	0.05	43
Uterine Corpus Endometrial Carcinoma (TCGA, PanCancer Atlas)	TCGA-AX-A06B-01	Uterine Endometrioid Carcinoma	X62_splice	Splice	Amp	0.1	41
Lung Adenocarcinoma (TCGA, PanCancer Atlas)	TCGA-78-8662-01	Lung Adenocarcinoma	X62_splice	Splice	Gain	0.53	1014
Cervical Squamous Cell Carcinoma (TCGA, PanCancer Atlas)	TCGA-Q1-A73O-01	Cervical Squamous Cell Carcinoma	X62_splice	Splice	Diploid	0.39	1300
Ampullary Carcinoma (Baylor College of Medicine, Cell Reports 2016)	DUOAC_508	Ampullary Carcinoma	X62_splice	Splice		0.09	814
Glioma (MSK, Nature 2019)	Patient-24-CSF	Glioblastoma Multiforme	K65T	Missense	Diploid	0.11	3
Glioma (MSK, Nature 2019)	Patient-24-T	Glioblastoma Multiforme	K65T	Missense	Diploid	0.4	3
Glioma (MSK, Clin Cancer Res 2019)	P-0010635-T01-IM5	Glioblastoma Multiforme	K65T	Missense	Diploid	0.41	3
Hepatocellular Carcinomas (INSERM, Nat Genet 2015)	CHC306T	Hepatocellular Carcinoma	C66Y	Missense			53
Lung Adenocarcinoma Met Organotropism (MSK, Cancer cell 2023)	P-0046101-T01-IM6	Lung Adenocarcinoma	M73I	Missense	Diploid	0.19	9
Breast Cancer (MSK, Cancer Cell 2018)	P-0006831-T01-IM5	Breast Invasive Ductal Carcinoma	S76*	Nonsense	Diploid	0.47	9
Bladder Cancer (MSK, Cell Reports 2022)	P-0044119-T02-IM6	Bladder Urothelial Carcinoma	E85K	Missense	Diploid	0.12	6
Lung Adenocarcinoma (MSK, J Thorac Oncol 2020)	P-0033766-T01-IM6	Lung Adenocarcinoma	A87S	Missense	Diploid	0.1	69
Thoracic PDX (MSK, Provisional)	MSK_LX1006	Lung Adenocarcinoma	A87S	Missense	Gain	0.17	75
Thoracic PDX (MSK, Provisional)	P-0033766-T01-IM6	Lung Adenocarcinoma	A87S	Missense	Diploid	0.1	69
Pan-Lung Cancer (TCGA, Nat Genet 2016)	LUAD-S01315-Tumor	Lung Adenocarcinoma	N91S	Missense	Gain	0.15	1748
Lung Adenocarcinoma (Broad, Cell 2012)	LUAD-S01315	Lung Adenocarcinoma	N91S	Missense	Diploid		1763
Lung Adenocarcinoma Met Organotropism (MSK, Cancer cell 2023)	P-0039078-T01-IM6	Lung Adenocarcinoma	D92V	Missense	Diploid	0.22	7
Lung Adenocarcinoma (TCGA, PanCancer Atlas)	TCGA-78-7163-01	Lung Adenocarcinoma	D98E	Missense	Diploid	0.05	49
Esophagogastric Cancer (MSK, Clin Cancer Res 2022)	P-0029430-T01-IM6	Adenocarcinoma of the Gastroesophageal Junction	D100A	Missense	Diploid	0.18	4
Esophageal/Stomach Cancer (MSK, 2020)	P-0029430-T01-IM6	Adenocarcinoma of the Gastroesophageal Junction	D100A	Missense	Diploid	0.18	4
Endometrial Cancer (MSK, 2018)	P-0004379-T01-IM5	Uterine Endometrioid Carcinoma	D100N	Missense	Diploid	0.33	443
Bladder Cancer (TCGA, Cell 2017)	TCGA-ZF-A9R7-01	Bladder Urothelial Carcinoma	E101Q	Missense	Diploid	0.31	627
Bladder Urothelial Carcinoma (TCGA, PanCancer Atlas)	TCGA-ZF-A9R7-01	Bladder Urothelial Carcinoma	E101Q	Missense	Diploid	0.31	636
Endometrial Cancer (MSK, 2018)	P-0001085-T01-IM3	Uterine Carcinosarcoma/Uterine Malignant Mixed Mullerian Tumor	L104F	Missense	Diploid	0.08	3
Esophageal/Stomach Cancer (MSK, 2020)	P-0020903-T01-IM6	Adenocarcinoma of the Gastroesophageal Junction	Q109*Germline	Nonsense	Diploid	0.51	6
Colorectal Adenocarcinoma (TCGA, PanCancer Atlas)	TCGA-A6-2686-01	Colon Adenocarcinoma	G112S	Missense	Gain	0.21	2139
Pediatric Brain Cancer (CPTAC/CHOP, Cell 2020)	7316-2156	Ependymomal Tumor	M115T	Missense	Diploid	0.08	587
Adrenocortical Carcinoma (TCGA, Firehose Legacy)	TCGA-OR-A5LE-01	Adrenocortical Carcinoma	M115T	Missense	Diploid	0.04	87
Bladder Cancer (MSK, Cell Reports 2022)	P-0021255-T01-IM6	Bladder Urothelial Carcinoma	C116R	Missense	Diploid	0.08	18
Uterine Corpus Endometrial Carcinoma (TCGA, Nature 2013)	TCGA-BG-A0LW-01	Uterine Endometrioid Carcinoma	C118F	Missense	Diploid	0.46	27
Desmoplastic Melanoma (Broad Institute, Nat Genet 2015)	49M	Desmoplastic Melanoma	V124I	Missense			2652
Uterine Corpus Endometrial Carcinoma (TCGA, PanCancer Atlas)	TCGA-AP-A1DP-01	Uterine Endometrioid Carcinoma	R125I	Missense	Diploid	0.08	448
Esophagogastric Cancer (MSK, Clin Cancer Res 2022)	P-0004076-T01-IM5	Esophageal Adenocarcinoma	R126K	Missense	Diploid	0.21	53
Lung Adenocarcinoma (CPTAC, Cell 2020)	C3N-01074	Lung Adenocarcinoma	T127S	Missense	Diploid	0.21	402
Metastatic Melanoma (DFCI, Nature Medicine 2019)	Sample135	Melanoma	D128Lfs*3	FS del	Diploid		381
Glioma (MSK, Clin Cancer Res 2019)	P-0017675-T01-IM5	Glioblastoma Multiforme	D128Y	Missense	Diploid	0.36	318
Kidney Renal Papillary Cell Carcinoma (TCGA, Firehose Legacy)	TCGA-5P-A9JW-01	Papillary Renal Cell Carcinoma	I133L	Missense	Diploid	0.3	72
Head and Neck Squamous Cell Carcinoma (TCGA, Nature 2015)	TCGA-CV-6961-01	Head and Neck Squamous Cell Carcinoma	S136C	Missense	Diploid	0.17	486
Lung Adenocarcinoma (TCGA, PanCancer Atlas)	TCGA-86-8279-01	Lung Adenocarcinoma	E137A	Missense	Diploid	0.09	455
Bladder Cancer (MSK, Cell Reports 2022)	P-0020877-T01-IM6	Bladder Urothelial Carcinoma	E137Q	Missense	Diploid	0.35	19
Uterine Corpus Endometrial Carcinoma (TCGA, PanCancer Atlas)	TCGA-EO-A22R-01	Uterine Endometrioid Carcinoma	R138*	Nonsense	Diploid	0.49	12771
Gastric Cancer (OncoSG, 2018)	GIS003-HK-pfg107	Stomach Adenocarcinoma	R138G	Missense	Gain	0.12	118
Melanoma (MSK, Clin Cancer Res 2021)	P-0018600-T01-IM6	Cutaneous Melanoma	W143*	Nonsense	Diploid	0.4	83
Metastatic Non-Small Cell Lung Cancer (MSK, Nature Medicine 2022)	P-0041477-T01-IM6	Lung Squamous Cell Carcinoma	E147*	Nonsense	Diploid	0.63	38
Rectal Cancer (MSK, Nature Medicine 2022)	P-0066240-T01-IM7	Rectal Adenocarcinoma	E147D	Missense		0.18	6
Lung Squamous Cell Carcinoma (TCGA, PanCancer Atlas)	TCGA-98-8021-01	Lung Squamous Cell Carcinoma	E147Q	Missense	Gain	0.07	932
Lung Adenocarcinoma (MSK, J Thorac Oncol 2020)	P-0020779-T01-IM6	Lung Adenocarcinoma	L148V	Missense	Diploid	0.09	12
Lung Adenocarcinoma (MSK, NPJ Precision Oncology 2021)	P-0020779-T01-IM6	Lung Adenocarcinoma	L148V	Missense	Diploid	0.09	12
Metastatic Prostate Adenocarcinoma (SU2C/PCF Dream Team, PNAS 2019)	TP_2069_Tumor	Prostate Adenocarcinoma	L148_K151del	IF del	Diploid		188
Basal Cell Carcinoma (UNIGE, Nat Genet 2016)	5-VS034-T1	Skin Cancer, Non-Melanoma	K149T	Missense		0.28	3047
Head and Neck Squamous Cell Carcinoma (TCGA, Nature 2015)	TCGA-CN-5359-01	Head and Neck Squamous Cell Carcinoma	P156H	Missense	Gain	0.21	133
Glioblastoma Multiforme (TCGA, PanCancer Atlas)	TCGA-06-1805-01	Glioblastoma Multiforme	S159C	Missense	Diploid	0.3	312
Upper Tract Urothelial Carcinoma (MSK, Nat Commun 2020)	P-0004688-T01-IM5	Upper Tract Urothelial Carcinoma	R163Q	Missense	Diploid	0.14	415
Rectal Cancer (MSK,Nature Medicine 2019)	RC-MSK-038-tm	Rectal Adenocarcinoma	R163W	Missense	Diploid	0.35	19
Metastatic Colorectal Cancer (MSK, Cancer Cell 2018)	P-0012115-T01-IM5	Colorectal Adenocarcinoma	T164I	Missense	Diploid	0.16	53
Colorectal Adenocarcinoma (TCGA, PanCancer Atlas)	TCGA-A6-2686-01	Colon Adenocarcinoma	X164_splice	Splice	Gain	0.13	2139
Uterine Corpus Endometrial Carcinoma (TCGA, PanCancer Atlas)	TCGA-AJ-A3EK-01	Uterine Endometrioid Carcinoma	X164_splice	Splice	Diploid	0.38	5729
Metastatic Breast Cancer (MSK, Cancer Discovery 2022)	P-0010361-T02-IM5	Breast Invasive Ductal Carcinoma	L166P	Missense	Diploid	0.23	10
Lung Adenocarcinoma (MSK, NPJ Precision Oncology 2021)	P-0018327-T01-IM6	Lung Adenocarcinoma	Q167L	Missense	Diploid	0.06	14
Rectal Cancer (MSK, Nature Medicine 2022)	P-00JM114-T01-IM5	Rectal Adenocarcinoma	T172M	Missense		0.2	99
Myelodysplastic (MSK, 2020)	CN-AML-08-T	Acute Myeloid Leukemia	T172M	Missense			941
Uterine Corpus Endometrial Carcinoma (TCGA, Nature 2013)	TCGA-AP-A056-01	Uterine Endometrioid Carcinoma	Y174C	Missense	Diploid	0.27	7232
Breast Cancer (MSK, Cancer Cell 2018)	P-0000438-T01-IM3	Breast Mixed Ductal and Lobular Carcinoma	P178L	Missense	Diploid	0.48	3
Head and Neck Squamous Cell Carcinoma (TCGA, Nature 2015)	TCGA-CV-6942-01	Head and Neck Squamous Cell Carcinoma	P178Q	Missense	Diploid	0.18	199
Melanoma (MSK, Clin Cancer Res 2021)	P-0016177-T01-IM6	Cutaneous Melanoma	P178Q	Missense	Diploid	0.07	6
Metastatic Non-Small Cell Lung Cancer (MSK, Nature Medicine 2022)	P-0041703-T01-IM6	Lung Adenocarcinoma	I181V	Missense	Diploid	0.13	13
Uterine Corpus Endometrial Carcinoma (TCGA, PanCancer Atlas)	TCGA-A5-A0G2-01	Uterine Serous Carcinoma/Uterine Papillary Serous Carcinoma	T182M	Missense	Gain	0.13	25698
Skin Cutaneous Melanoma (Broad, Cell 2012)	MEL-Ma-Mel-85	Cutaneous Melanoma	T182R	Missense			750
Colorectal Cancer (MSK, Gastroenterology 2020)	P-0017992-T01-IM6	Colon Adenocarcinoma	X186_splice	Splice	Diploid	0.23	10
Small Cell Lung Cancer (U Cologne, Nature 2015)	sclc_ucologne_2015_S00841	Small Cell Lung Cancer	Y186C	Missense		0.4	380
Bladder Urothelial Carcinoma (BGI, Nat Genet 2013)	B64	Bladder Urothelial Carcinoma	E187G	Missense			53
Lung Adenocarcinoma Met Organotropism (MSK, Cancer cell 2023)	P-0021387-T01-IM6	Lung Adenocarcinoma	L195V	Missense	Diploid	0.06	56
Cutaneous Squamous Cell Carcinoma (MD Anderson, Clin Cancer Res 2014)	CSCC-10-T	Cutaneous Squamous Cell Carcinoma	V196A	Missense		0.25	2430
Melanoma (MSK, Clin Cancer Res 2021)	P-0005228-T01-IM5	Cutaneous Melanoma	Q197*	Nonsense	Diploid	0.24	94
Uterine Corpus Endometrial Carcinoma (TCGA, PanCancer Atlas)	TCGA-A5-A2K5-01	Uterine Endometrioid Carcinoma	N198H	Missense	Diploid	0.41	8510
Breast Cancer (MSK, Cancer Cell 2018)	P-0012532-T01-IM5	Breast Invasive Ductal Carcinoma	S199Y	Missense	Diploid	0.05	13
Ampullary Carcinoma (Baylor College of Medicine, Cell Reports 2016)	DUOAC_781	Ampullary Carcinoma	T203Lfs*7	FS del		0.16	1752
Lung Adenocarcinoma (OncoSG, Nat Genet 2020)	BGI-RS55	Lung Adenocarcinoma	Q204E	Missense	Gain	0.26	108
Colorectal Adenocarcinoma (DFCI, Cell Reports 2016)	coadread_dfci_2016_345	Colorectal Adenocarcinoma	D206E	Missense			1395
Metastatic Melanoma (DFCI, Science 2015)	Pat139	Cutaneous Melanoma	D206N	Missense	Gain	0.42	1390
Melanoma (MSK, Clin Cancer Res 2021)	P-0019720-T01-IM6	Cutaneous Melanoma	D208N	Missense	Diploid	0.36	42
Lung Adenocarcinoma (TCGA, Firehose Legacy)	TCGA-44-6779-01	Lung Adenocarcinoma	A210T	Missense	Gain	0.23	90
Thoracic PDX (MSK, Provisional)	P-0032035-T01-IM6	Lung Adenocarcinoma	V212M	Missense	Diploid	0.63	18
Colorectal Cancer (MSK, Gastroenterology 2020)	P-0017992-T01-IM6	Colon Adenocarcinoma	F216C	Missense	Diploid	0.07	10
Metastatic Melanoma (DFCI, Nature Medicine 2019)	Sample62	Melanoma	D219N	Missense	Diploid		6204
Uterine Corpus Endometrial Carcinoma (TCGA, PanCancer Atlas)	TCGA-EY-A1GI-01	Uterine Endometrioid Carcinoma	D219Y	Missense	Diploid	0.4	4487
Breast Cancer (MSK, Cancer Cell 2018)	P-0006996-T01-IM5	Breast Invasive Ductal Carcinoma	X219_splice	Splice	Diploid	0.14	7
Melanoma (MSK, Clin Cancer Res 2021)	P-0006621-T01-IM5	Cutaneous Melanoma	V220I	Missense	Diploid	0.36	77
Skin Cutaneous Melanoma (TCGA, PanCancer Atlas)	TCGA-QB-AA9O-06	Cutaneous Melanoma	X220_splice	Splice	Diploid	0.31	1263
Lung Adenocarcinoma (Broad, Cell 2012)	LUAD-B00416	Lung Adenocarcinoma	G222V	Missense	Gain		801
Melanoma (MSK, Clin Cancer Res 2021)	P-0025945-T01-IM6	Cutaneous Melanoma	S224F	Missense	Diploid	0.39	168
Rectal Cancer (MSK, Nature Medicine 2022)	P-00TM222-T01-IM3	Rectal Adenocarcinoma	L225F	Missense		0.06	5
Melanoma (MSK, Clin Cancer Res 2021)	P-0036809-T01-IM6	Cutaneous Melanoma	H227Y	Missense	Diploid	0.31	151
Melanoma (MSK, Clin Cancer Res 2021)	P-0010726-T01-IM5	Melanoma of Unknown Primary	H227Y	Missense	Diploid	0.15	95
Proteogenomic landscape of breast cancer (CPTAC, Cell 2020)	X15BR003	Invasive Breast Carcinoma	H227Y	Missense	Diploid	0.07	656
Metastatic Melanoma (DFCI, Nature Medicine 2019)	Sample206	Melanoma	S228F	Missense	Diploid		5380
Bladder Urothelial Carcinoma (TCGA, PanCancer Atlas)	TCGA-ZF-A9RF-01	Bladder Urothelial Carcinoma	K229N	Missense	Diploid	0.18	232
Prostate Adenocarcinoma (TCGA, Firehose Legacy)	TCGA-TP-A8TV-01	Prostate Adenocarcinoma	K230Q	Missense	ShallowDel	0.43	43
Skin Cutaneous Melanoma (TCGA, Firehose Legacy)	TCGA-EE-A2GS-06	Cutaneous Melanoma	D232N	Missense	Diploid	0.39	296
Melanomas (TCGA, Cell 2015)	TCGA-EE-A2GS-06	Cutaneous Melanoma	D232N	Missense		0.39	285
Hepatocellular Carcinomas (INSERM, Nat Genet 2015)	CHC1754T	Hepatocellular Carcinoma	D232Y	Missense			193
Skin Cutaneous Melanoma (TCGA, PanCancer Atlas)	TCGA-QB-AA9O-06	Cutaneous Melanoma	G237R	Missense	Diploid	0.26	1263
Rectal Cancer (MSK, Nature Medicine 2022)	P-0069605-T01-IM7	Rectal Adenocarcinoma	E238Gfs*16	FS ins		0.14	66
Melanoma (MSK, Clin Cancer Res 2021)	P-0020082-T01-IM6	Melanoma of Unknown Primary	E238K	Missense	Diploid	0.17	63
Metastatic Breast Cancer (MSK, Cancer Discovery 2022)	P-0001376-T01-IM3	Breast Mixed Ductal and Lobular Carcinoma	Q239H	Missense	Diploid	0.36	6
Uterine Corpus Endometrial Carcinoma (TCGA, PanCancer Atlas)	TCGA-AP-A051-01	Uterine Endometrioid Carcinoma	D241Y	Missense	Diploid	0.22	8312
Lung Adenocarcinoma Met Organotropism (MSK, Cancer cell 2023)	P-0019323-T01-IM6	Lung Adenocarcinoma	Q246H	Missense	Diploid	0.21	31
Rectal Cancer (MSK, Nature Medicine 2022)	P-00JM078-T01-IM5	Rectal Adenocarcinoma	I249Lfs*3	FS del		0.06	6
Endometrial Carcinoma MSI (MSK, Clin Cancer Res 2022)	MMR_EC143	Endometrial Carcinoma	I249Lfs*3	FS del			43
Endometrial Carcinoma MSI (MSK, Clin Cancer Res 2022)	MMR_EC149	Endometrial Carcinoma	I249Lfs*3	FS del			43
Glioma (MSK, Clin Cancer Res 2019)	P-0002452-T01-IM3	Glioblastoma Multiforme	Y251C	Missense	Diploid	0.41	3
Endometrial Carcinoma MSI (MSK, Clin Cancer Res 2022)	MMR_EC134	Endometrial Carcinoma	D253V	Missense			38
Glioma (MSK, Clin Cancer Res 2019)	P-0003120-T01-IM5	Anaplastic Oligodendroglioma	P257S	Missense	Diploid	0.35	46
Uterine Corpus Endometrial Carcinoma (TCGA, PanCancer Atlas)	TCGA-E6-A1LX-01	Uterine Endometrioid Carcinoma	E258A	Missense	Diploid	0.17	12694
Non-Small Cell Lung Cancer (MSK, Cancer Cell 2018)	nsclc_mskcc_2018s23	Lung Adenocarcinoma	Q262H	Missense		0.07	215
Pan-Lung Cancer (TCGA, Nat Genet 2016)	TCGA-44-4112-01	Lung Adenocarcinoma	G263V	Missense	Diploid	0.2	381
Lung Adenocarcinoma (TCGA, Firehose Legacy)	TCGA-44-4112-01	Lung Adenocarcinoma	G263V	Missense	Diploid	0.25	370
Lung Adenocarcinoma Met Organotropism (MSK, Cancer cell 2023)	P-0011142-T01-IM5	Lung Adenocarcinoma	L264P	Missense	Diploid	0.11	14
Lung Adenocarcinoma (CPTAC, Cell 2020)	C3N-00180	Lung Adenocarcinoma	G267C	Missense	Gain	0.33	98
Cutaneous Squamous Cell Carcinoma (UCSF, NPJ Genom Med 2021)	cscc-ucsf-2021-Sample40	Cutaneous Squamous Cell Carcinoma	V268I	Missense		0.34	1083
Bladder Cancer (MSK, Cell Reports 2022)	P-0050206-T01-IM6	Bladder Urothelial Carcinoma	I269T	Missense	Diploid	0.11	17
Esophageal Carcinoma (TCGA, Nature 2017)	TCGA-CG-4305-01	Esophagogastric Cancer	I269V	Missense		0.26	1239
Metastatic Colorectal Cancer (MSK, Cancer Cell 2018)	P-0006906-T01-IM5	Colorectal Adenocarcinoma	A270S	Missense	Diploid	0.32	10
Sarcoma (MSK, Nat Commun. 2022)	P-0029601-T01-IM6	Chondrosarcoma	A270V	Missense	Diploid	0.14	17
Cutaneous Squamous Cell Carcinoma (UCSF, NPJ Genom Med 2021)	cscc-ucsf-2021-Sample59	Cutaneous Squamous Cell Carcinoma	V274I	Missense		0.21	2808
Glioma (MSK, Clin Cancer Res 2019)	P-0019134-T01-IM6	Anaplastic Astrocytoma	V276M	Missense	Diploid	0.45	6
Lung Adenocarcinoma Met Organotropism (MSK, Cancer cell 2023)	P-0009691-T04-IM6	Lung Adenocarcinoma	V276_V280del	IF del	Diploid	0.19	31
Prostate Adenocarcinoma (MSK, Eur Urol 2020)	P-0021909-T01-IM6	Prostate Adenocarcinoma	V285del	IF del	Diploid	0.08	1
Colorectal Adenocarcinoma (TCGA, Firehose Legacy)	TCGA-A6-2676-01	Colon Adenocarcinoma	V285del	IF del	Diploid		609
Lung Squamous Cell Carcinoma (CPTAC, Cell 2021)	C3N-03875	Lung Adenocarcinoma	L286=	Splice		0.31	472
Rectal Cancer (MSK, Nature Medicine 2022)	P-00JM026-T01-WES	Rectal Adenocarcinoma	X286_splice	Splice		0.18	1135
Bladder Cancer (MSK/TCGA, 2020)	TCGA-E7-A7XN-01	Bladder Urothelial Carcinoma	X287_splice	Splice	Diploid	0.13	867
Lung Adenocarcinoma (MSK, J Thorac Oncol 2020)	P-0035922-T01-IM6	Lung Adenocarcinoma	I288Pfs*14	FS del	Diploid	0.09	5
Bladder Cancer (MSK, Cell Reports 2022)	P-0032284-T01-IM6	Bladder Urothelial Carcinoma	S289F	Missense	Diploid	0.11	119
Esophageal Carcinoma (TCGA, Nature 2017)	TCGA-D7-A747-01	Esophagogastric Cancer	S289Y	Missense	Diploid	0.06	99
Melanoma (MSK, Clin Cancer Res 2021)	P-0012860-T01-IM5	Cutaneous Melanoma	R293K	Missense	Diploid	0.25	97
Lung Squamous Cell Carcinoma (TCGA, Nature 2012)	TCGA-37-3789-01	Lung Squamous Cell Carcinoma	M294I	Missense	Diploid	0.05	976
Uterine Corpus Endometrial Carcinoma (TCGA, PanCancer Atlas)	TCGA-PG-A917-01	Uterine Endometrioid Carcinoma	A295T	Missense	Diploid	0.41	715
Metastatic Breast Cancer (MSK, Cancer Discovery 2022)	P-0013486-T02-IM6	Invasive Breast Carcinoma	K296N	Missense	Diploid	0.39	27
Glioma (MSK, Clin Cancer Res 2019)	P-0010713-T01-IM5	Glioblastoma Multiforme	E298A	Missense	Diploid	0.26	3
Pan-Lung Cancer (TCGA, Nat Genet 2016)	TCGA-68-8251-01	Lung Squamous Cell Carcinoma	E298K	Missense	Diploid	0.02	281
Cutaneous Squamous Cell Carcinoma (UCSF, NPJ Genom Med 2021)	cscc-ucsf-2021-Sample30	Cutaneous Squamous Cell Carcinoma	E301E	Splice		0.29	1327
Diffuse Glioma (GLASS Consortium, Nature 2019)	GLSS-HF-2869-R3	Glioblastoma	X301_splice	Splice		0.11	10161
Race Differences in Prostate Cancer (MSK, 2021)	P-0015570-T01-IM6	Prostate Adenocarcinoma	X302_splice	Splice	Diploid	0.25	61
Colorectal Adenocarcinoma (TCGA, PanCancer Atlas)	TCGA-AZ-4315-01	Colon Adenocarcinoma	E304A	Missense	Diploid	0.32	6313
Melanoma (MSK, Clin Cancer Res 2021)	P-0007810-T02-IM5	Melanoma of Unknown Primary	E304K	Missense	Diploid	0.06	44
Germ Cell Tumors (MSK, J Clin Oncol 2016)	P-0001058-T01-IM3	Non-Seminomatous Germ Cell Tumor	M305I	Missense	Diploid	0.11	12
Brain Lower Grade Glioma (TCGA, PanCancer Atlas)	TCGA-FG-5965-01	Oligoastrocytoma	M305V	Missense	Diploid	0.15	40
Diffuse Glioma (GLASS Consortium, Nature 2019)	TCGA-FG-5965-TP	Diffuse Astrocytoma	M305V	Missense		0.15	41
Hepatocellular Carcinoma (MSK, Clin Cancer Res 2018)	P-0019422-T01-IM6	Hepatocellular Carcinoma	E307K	Missense	Diploid	0.1	14
Colorectal Adenocarcinoma (DFCI, Cell Reports 2016)	coadread_dfci_2016_2197	Colorectal Adenocarcinoma	M308I	Missense			954
Race Differences in Prostate Cancer (MSK, 2021)	P-0018086-T01-IM6	Prostate Adenocarcinoma	L312F	Missense	Diploid	0.26	7
Stomach Adenocarcinoma (TCGA, PanCancer Atlas)	TCGA-VQ-A8PO-01	Signet Ring Cell Carcinoma of the Stomach	L312P	Missense	Diploid	0.14	751

## Sheet: Sheet2
# Mut in Sample	Colon	Uterine	Lung	Head and Neck	Breast	Ovarian	Pancreatic	Prostate	Bladder	Esophgeal
600	V36I	G86W
	K202T	V40A													# Mut in Sample	Colon	Uterine	Lung	Head and Neck	Breast	Ovarian	Pancreatic	Prostate	Bladder	Esophgeal
		A278S													M5	7	4	20		11	4	10	7	5	4
500	K265N	M69I													M15	4	5	14	2	9		3	3	5	4
		T134I													M25	6	3	23		6	2	3	2	7	1
	K77N	V212M				C27R									M50	1	1	41		3	7	1	2	8	2
400	G10R	R163Q													M100	18	3	8	1	1	2			6	3
	D219Y	V235I													M200	10	2	2		1	2
		N43T													M300	2	9		1
		D128G													M400	2	4				1
300	S161I	M231I		Q89K											M500	2	3
	D219Y	L67V													M600	2	3
		E311A														54	37	108	4	31	18	17	14	31	14
		F180C
		K65N
		K179Q
		E26K
		L264I
		D243E
200	E311K
	N188S	F180C			M73I
	E223A	T17K				F39L
	M73T					D253N
	M231T
	A21T
	R163Q
	I193V		Q246H
	A122D		Q201E
	T247A								S289F
100	I193V
	L166R								F9L	T134S
	Y186*									R126K
	A122D									D158E
	L13P	A18V
	A63T
	A21T	G123V				T172M
	D98G			X186_splice
	V235A								E72K
	C135F								S289F
	C38R								R44H
	F9V	T172M	A87S
	X186_splice		D243V
	T172M		Q246E
	V196A		X287_splice
	R126del		T172M
	V196A		Q89H
	L94R		A2V						S136C
					N31K
			L195V			T172M
50						L88F
	S136C		K160*			X164_splice		T172M
					L264V
			E298V	X164_splice
			Y215N				Q89H		L195V
			Q204E						S224Y
		V57G	G112S						E101Q	G75D
			E147*						S199F	D96Y
			L286Q			A165T
			D92V			Q89H
			Y32N
			I209V
			I193V
			H150Q			Q89H
			A278V
			Q246H
			L286Q
			C27Y
			A278V
			S76*
			D243V		Q24*
			P178A			A8S
			V268F
			M115T		M115K
			N91S
			M261T
			A18V
			R173H
			Q204H					A2V
			E30*						P244L
			A165T						A2S
			Y32N						E217Q
			Q45*						R173H
			P4Rfs*33
			L264P
			K296N
			I288V
			E301K
			A256Hfs*9
			A18P
			Y95H
			Y32N
25			P178L						M73I
	I193V				K296N				I193V
			I193V		P3H				E137Q
		G93E	N189Y				Q45L		N42I
		R173H	E25V				I193V		V51I
			T17M						G79V
			K296E
			K291T
	D100V		V276L
			S60*
			K83E		E217Q					K108*
	A314E		Y215N
			V275A
			V212M
			R173S
			M305I
			L7F				I193V
			G245V
			S228F		F39S
			S224C					N37K
			I272T		L78V
	A278V		G103W		Y174F
	T17M		Q204*
	I193V		A14V							N55K
		D100V	R126K						C116R
15	N91S		Q204H		R81K			R173H	I269T
	S289F	R173H	A82G		I193V			I133V	E72Q
			Q167L			N37K			P257H
			L264P		I272T				N111D
					E85D				D219N
			S228F		T247P		T234I
			S224C	Q45L	S199Y
		N41S			N91S
		N37Y	I181V							A256P
	A23P		D158Y				V280L			N55K
	I193V		L148V		I193V
			G237W	F39C
			D100G		A165T		A210V
			V6I			A107V				V285G
		V119L	S136F
10		R310G	Q262E			N74K	Q54R
	I193V		I193V				H150Q		Y32H
	F39C		E101V		R163L		G75D		E85K	T127K
						R163L	R293I		T164I
								N43Y	Q24E
					N37K				Q167*
			I193V		L166P	L166P
	F216C		G112D
	D219E		E223Q
	A270S		R173L				R173H			V280I
		R44H	R163L							T247P
		I288V	M73I			Q54R		M305I
	G112S		I193V
			Q262E		P84R		M308I	I193V		S60L
		N37K	A8G		G267D
	L11R				A165T			S60L
					Q246E			L312F
							I272T	I272T
			I193V				I193V
			D92V		A165T		E301K	G93R
			E304K		Q239H			E101G
		N111K	D232H		V252L	R163Q		A15L
			E304K				T17M	L104R
			Y174C
			S159N		R138Q
			N37K					I302V		K202Q
								V285del
