# Supplementary material for: Landscape of cancer associated EpCAM mutations: molecular modeling, Predictive Insights and Impact on Patient Survival
Source: Research Square preprint supplement (doi:10.21203/rs.3.rs-6174915/v1), 2025-03-12
Supplement: Supplementary file 1 [file Figure S1.pdf › Figure S1.pdf]

Supplementary Figure 1.

A.

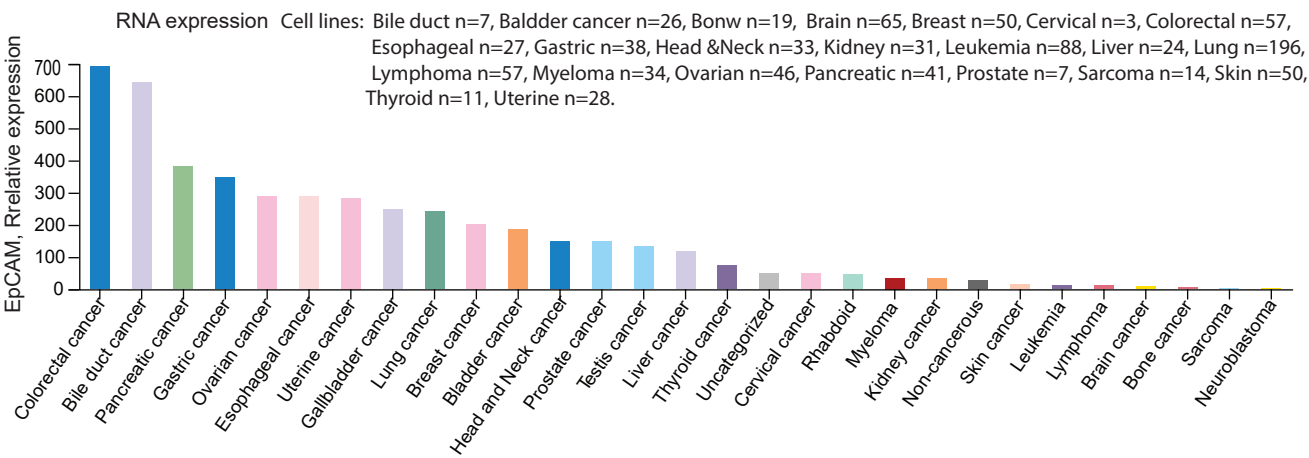

GSE32474-NCI60 cell lines

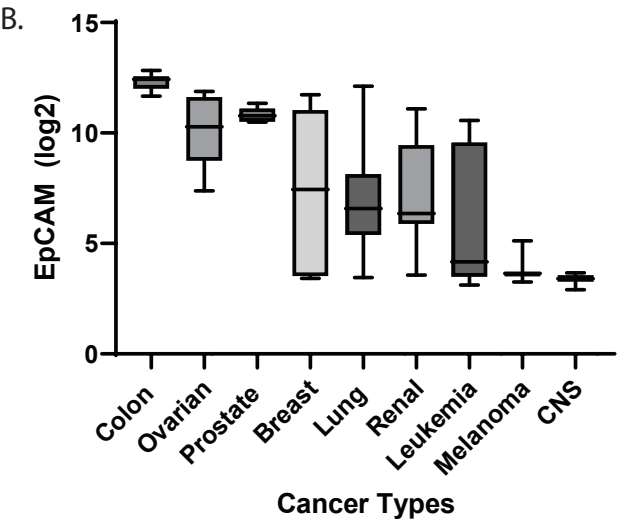

C. EpCAM mutation distribution

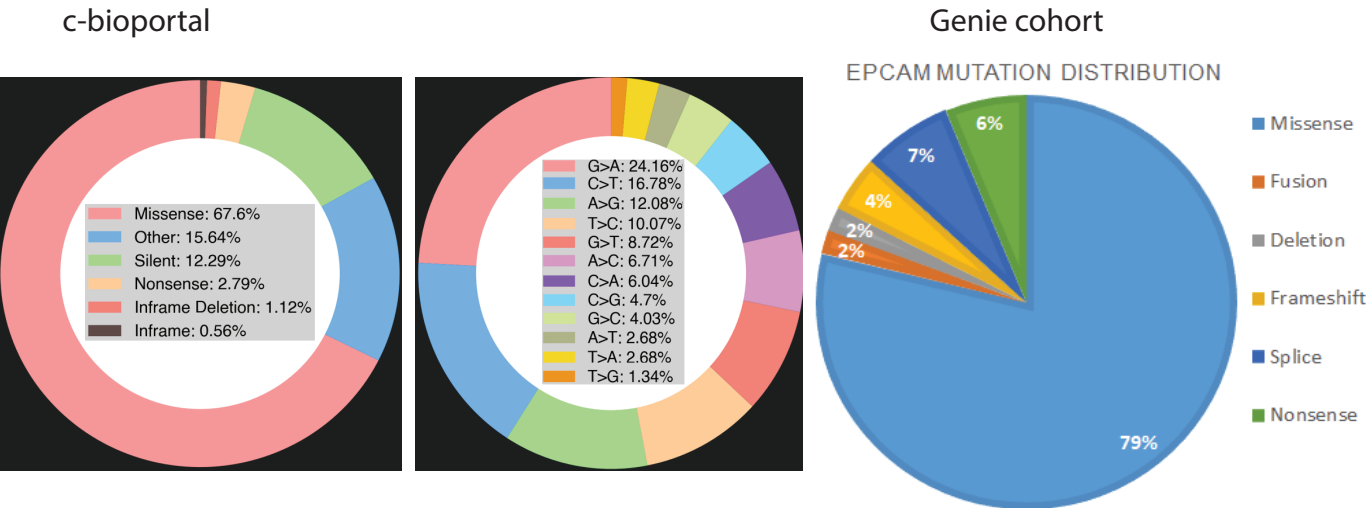

**Supplementary Figure 1: EpCAM expression is restricted in epithelial cells/organs. (A)** RNA expression levels of EpCAM form normal tissue, data acquired from Protein Atlas ([www.proteinatlas.org](http://www.proteinatlas.org)). **(B)** EpCAM expression in different cancer types, data analyzed from cancer cell lines NCI-60 (GSE32474). **(C)** EpCAM mutation distribution in c-bioportal and Genie cohort.
