# Supplementary material for: Landscape of cancer associated EpCAM mutations: molecular modeling, Predictive Insights and Impact on Patient Survival
Source: Research Square preprint supplement (doi:10.21203/rs.3.rs-6174915/v1), 2025-03-12
Supplement: Supplementary file 2 [file Data Figure S2C CCLE cell lines-EpCAM mutation.xlsx]

## Sheet: CCLE EpCAM mutation
Sample ID	Cancer Type	Protein Change	Functional Impact	Mutation Type	Copy #	Start Pos	End Pos	Ref	Var
MFE296	Endometrial Cancer	X62_splice	MutationAssessor: NA;SIFT: NA;Polyphen-2: NA;AlphaMissense: NA	Splice_Site	Diploid	47600710	47600710	G	C
SNGM	Endometrial Cancer	T203Nfs*4	MutationAssessor: NA;SIFT: NA;Polyphen-2: NA;AlphaMissense: NA	Frame_Shift_Ins	Diploid	47606137	47606138	-	A
HEC59	Endometrial Cancer	T203Nfs*4	MutationAssessor: NA;SIFT: NA;Polyphen-2: NA;AlphaMissense: NA	Frame_Shift_Ins	Diploid	47606137	47606138	-	A
MOLM16	Leukemia	T203Nfs*4	MutationAssessor: NA;SIFT: NA;Polyphen-2: NA;AlphaMissense: NA	Frame_Shift_Ins	Diploid	47606137	47606138	-	A
TOV21G	Ovarian Cancer	Q5Afs*26	MutationAssessor: NA;SIFT: NA;Polyphen-2: NA;AlphaMissense: NA	Frame_Shift_Ins	Diploid	47596650	47596651	-	C
LAN6	Peripheral Nervous System	X26_splice	MutationAssessor: NA;SIFT: NA;Polyphen-2: NA;AlphaMissense: NA	Splice_Region		47600603	47600603	A	G
JHOS2	Ovarian Cancer	P84S	MutationAssessor: impact: low, score: 4.884863781178302;SIFT: impact: tolerated, score: 0.05;Polyphen-2: impact: probably_damaging, score: 1;AlphaMissense: pathogenicity: pathogenic, score: 0.7453	Missense_Mutation	Diploid	47601012	47601012	C	T
JEKO1	Mature B-Cell Neoplasms	P84S	MutationAssessor: impact: low, score: 4.884863781178302;SIFT: impact: tolerated, score: 0.05;Polyphen-2: impact: probably_damaging, score: 1;AlphaMissense: pathogenicity: pathogenic, score: 0.7453	Missense_Mutation	Diploid	47601012	47601012	C	T
EFO27	Ovarian Cancer	T182M	MutationAssessor: impact: medium, score: 5.186745590890932;SIFT: impact: deleterious, score: 0.02;Polyphen-2: impact: possibly_damaging, score: 0.446;AlphaMissense: pathogenicity: benign, score: 0.15	Missense_Mutation	Diploid	47604206	47604206	C	T
NCIH1734	Non-Small Cell Lung Cancer	A278S	MutationAssessor: impact: low, score: 4.297909755935714;SIFT: impact: deleterious, score: 0.04;Polyphen-2: impact: possibly_damaging, score: 0.73;AlphaMissense: pathogenicity: ambiguous, score: 0.3732	Missense_Mutation	Diploid	47607082	47607082	G	T
RH18_	Soft Tissue Sarcoma	Q201K	MutationAssessor: impact: low, score: 2.8433135127109646;SIFT: impact: tolerated, score: 0.1;Polyphen-2: impact: benign, score: 0.006;AlphaMissense: pathogenicity: benign, score: 0.1568	Missense_Mutation	Diploid	47606137	47606137	C	A
MERO25	Mesothelioma	N37K	MutationAssessor: NA;SIFT: impact: tolerated, score: 0.58;Polyphen-2: impact: benign, score: 0.035;AlphaMissense: pathogenicity: benign, score: 0.1935	Missense_Mutation		47600636	47600636	C	G
SKES1	Bone Cancer	A107T	MutationAssessor: impact: medium, score: 5.527029790067474;SIFT: impact: deleterious, score: 0;Polyphen-2: impact: probably_damaging, score: 0.911;AlphaMissense: pathogenicity: pathogenic, score: 0.6987	Missense_Mutation	Diploid	47601081	47601081	G	A
UMCHOR1	Bone Cancer	P244A	MutationAssessor: NA;SIFT: impact: tolerated, score: 0.07;Polyphen-2: impact: probably_damaging, score: 0.994;AlphaMissense: pathogenicity: benign, score: 0.1186	Missense_Mutation		47606980	47606980	C	G
HPBALL	T-Lymphoblastic Leukemia/Lymphoma	A314V	MutationAssessor: NA;SIFT: impact: deleterious_low_confidence, score: 0;Polyphen-2: impact: possibly_damaging, score: 0.478;AlphaMissense: pathogenicity: benign, score: 0.2053	Missense_Mutation	DeepDel	47613748	47613748	C	T
HCC202	Breast Cancer	N111K	MutationAssessor: impact: low, score: 5.058653888194727;SIFT: impact: deleterious, score: 0;Polyphen-2: impact: probably_damaging, score: 0.999;AlphaMissense: pathogenicity: pathogenic, score: 0.8652	Missense_Mutation	Diploid	47601095	47601095	C	A
MFE319	Endometrial Cancer	T56A	MutationAssessor: impact: neutral, score: 2.1876108090435316;SIFT: impact: tolerated, score: 0.57;Polyphen-2: impact: benign, score: 0.015;AlphaMissense: pathogenicity: benign, score: 0.0722	Missense_Mutation	Diploid	47600691	47600691	A	G
NCIH1792	Non-Small Cell Lung Cancer	V285L	MutationAssessor: impact: low, score: 3.73763304317637;SIFT: impact: tolerated, score: 0.06;Polyphen-2: impact: benign, score: 0.314;AlphaMissense: pathogenicity: benign, score: 0.3152	Missense_Mutation	Diploid	47607103	47607103	G	T
WM88	Melanoma	S228Y	MutationAssessor: impact: low, score: 4.4351629344652785;SIFT: impact: deleterious, score: 0;Polyphen-2: impact: possibly_damaging, score: 0.862;AlphaMissense: pathogenicity: benign, score: 0.2293	Missense_Mutation	Diploid	47606933	47606933	C	A
SUIT2	Pancreatic Cancer	S228Y	MutationAssessor: impact: low, score: 4.4351629344652785;SIFT: impact: deleterious, score: 0;Polyphen-2: impact: possibly_damaging, score: 0.862;AlphaMissense: pathogenicity: benign, score: 0.2293	Missense_Mutation	Diploid	47606933	47606933	C	A
CORL303	Small Cell Lung Cancer	Q262L	MutationAssessor: impact: medium, score: 5.171515987148577;SIFT: impact: deleterious, score: 0;Polyphen-2: impact: benign, score: 0.081;AlphaMissense: pathogenicity: benign, score: 0.3143	Missense_Mutation		47607035	47607035	A	T
HCC2998	Colorectal Cancer	Y215S	MutationAssessor: impact: medium, score: 5.191720756317516;SIFT: impact: deleterious, score: 0;Polyphen-2: impact: probably_damaging, score: 0.997;AlphaMissense: pathogenicity: pathogenic, score: 0.9304	Missense_Mutation		47606180	47606180	A	C
M14	Melanoma	K108R	MutationAssessor: impact: neutral, score: 2.4363946616469705;SIFT: impact: tolerated, score: 1;Polyphen-2: impact: benign, score: 0.028;AlphaMissense: pathogenicity: benign, score: 0.0879	Missense_Mutation		47601085	47601085	A	G
MOT	Mature B-Cell Neoplasms	Q45L	MutationAssessor: impact: low, score: 3.2485065568865643;SIFT: impact: tolerated, score: 0.25;Polyphen-2: impact: benign, score: 0.015;AlphaMissense: pathogenicity: benign, score: 0.1176	Missense_Mutation		47600659	47600659	A	T
NBSUSSR	Peripheral Nervous System	T192I	MutationAssessor: impact: neutral, score: 2.58609945315632;SIFT: impact: tolerated, score: 0.43;Polyphen-2: impact: benign, score: 0.005;AlphaMissense: pathogenicity: benign, score: 0.1337	Missense_Mutation		47606111	47606111	C	T
NCIH513	Mesothelioma	Q109P	MutationAssessor: impact: medium, score: 5.885486366146159;SIFT: impact: deleterious, score: 0;Polyphen-2: impact: probably_damaging, score: 0.969;AlphaMissense: pathogenicity: pathogenic, score: 0.9865	Missense_Mutation		47601088	47601088	A	C
SNU1040	Colorectal Cancer	G222S	MutationAssessor: impact: low, score: 4.502272729498293;SIFT: impact: tolerated, score: 0.09;Polyphen-2: impact: benign, score: 0.255;AlphaMissense: pathogenicity: benign, score: 0.1722	Missense_Mutation	Diploid	47606914	47606914	G	A
SNUC5	Colorectal Cancer	N120S	MutationAssessor: impact: medium, score: 5.329961236165996;SIFT: impact: deleterious, score: 0.01;Polyphen-2: impact: probably_damaging, score: 0.998;AlphaMissense: pathogenicity: pathogenic, score: 0.7113	Missense_Mutation	Diploid	47601121	47601121	A	G
NCIH1666	Non-Small Cell Lung Cancer	EPCAM-MSH6 Fusion	MutationAssessor: NA;SIFT: NA;Polyphen-2: NA;AlphaMissense: NA	fusion	Diploid	47596720
LS180	Colorectal Cancer	EPCAM intragenic	MutationAssessor: NA;SIFT: NA;Polyphen-2: NA;AlphaMissense: NA	fusion		47572040
HCC515	Non-Small Cell Lung Cancer	EPCAM intragenic	MutationAssessor: NA;SIFT: NA;Polyphen-2: NA;AlphaMissense: NA	fusion		47572040
HCC56_LARGE_INTESTIN	Colorectal Cancer	EPCAM intragenic	MutationAssessor: NA;SIFT: NA;Polyphen-2: NA;AlphaMissense: NA	fusion		47572040
SW948	Colorectal Cancer	EPCAM intragenic	MutationAssessor: NA;SIFT: NA;Polyphen-2: NA;AlphaMissense: NA	fusion		47572040
SNU719	Esophagogastric Cancer	EPCAM intragenic	MutationAssessor: NA;SIFT: NA;Polyphen-2: NA;AlphaMissense: NA	fusion		47572040
SNU719	Esophagogastric Cancer	EPCAM intragenic	MutationAssessor: NA;SIFT: NA;Polyphen-2: NA;AlphaMissense: NA	fusion		47572040
