# Supplementary material for: Landscape of cancer associated EpCAM mutations: molecular modeling, Predictive Insights and Impact on Patient Survival
Source: Research Square preprint supplement (doi:10.21203/rs.3.rs-6174915/v1), 2025-03-12
Supplement: Supplementary file 2 [file Figure S3.pdf › Figure S3.pdf]

Supplementary Figure 3.

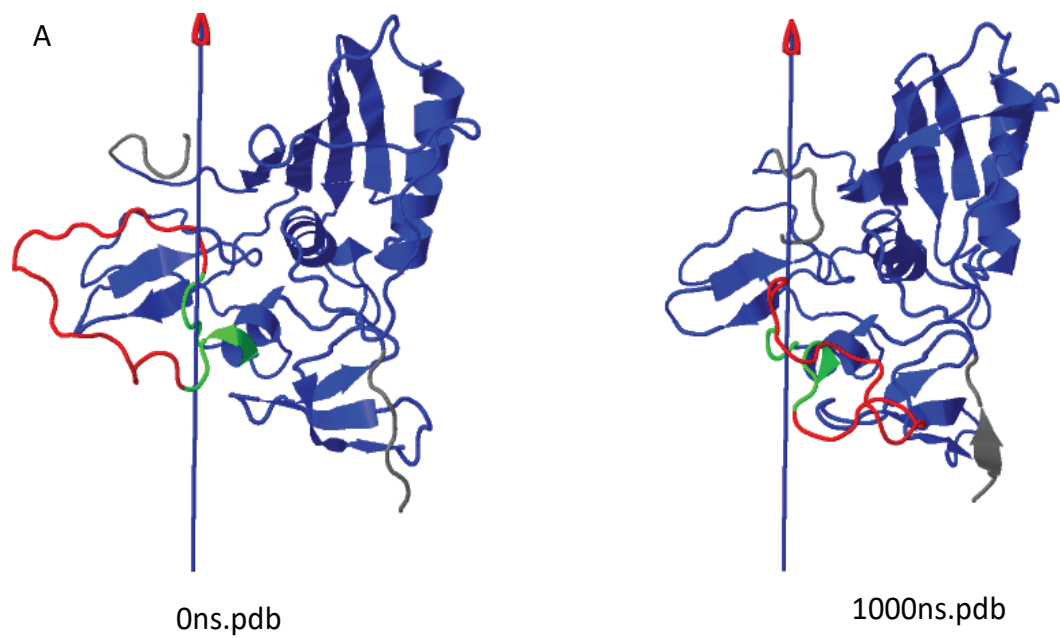

Supplementary Figure 3. Displacement, movement and motion of the TY-1 loop by DynDom.
