# Supplementary material for: Landscape of cancer associated EpCAM mutations: molecular modeling, Predictive Insights and Impact on Patient Survival
Source: Research Square preprint supplement (doi:10.21203/rs.3.rs-6174915/v1), 2025-03-12
Supplement: Supplementary file 4 [file Figure S5.pdf › Figure S5.pdf]

Supplementary Figure 5.

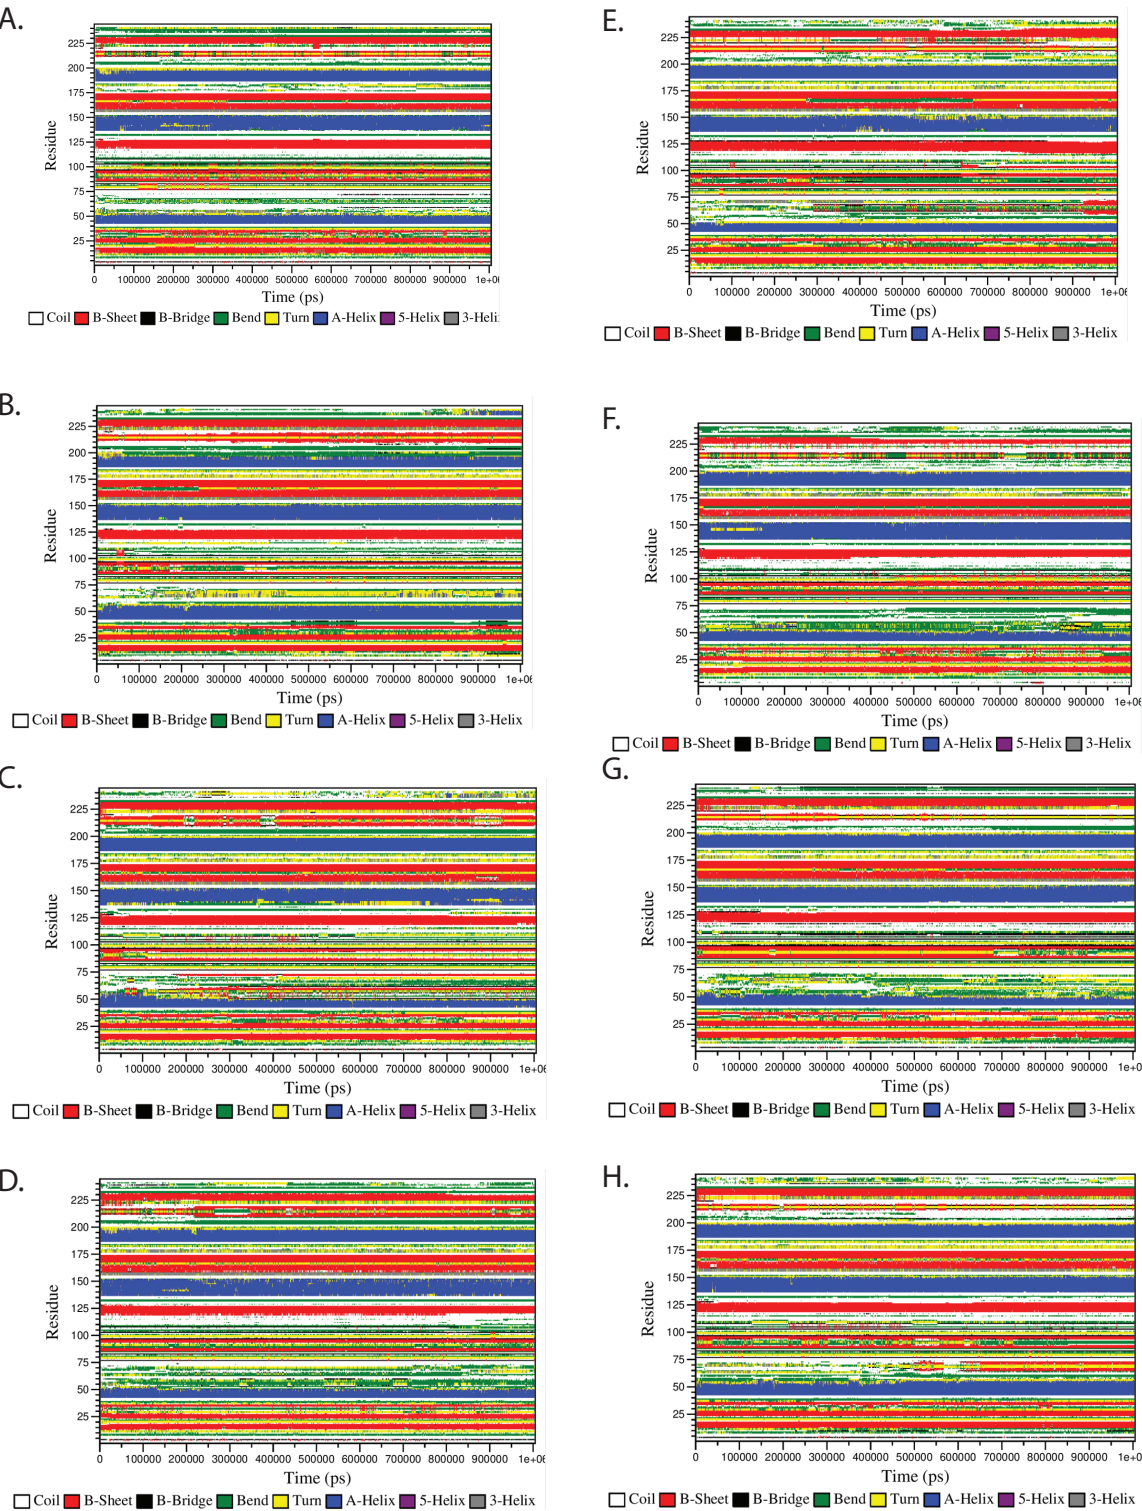

**Supplementary Figure 5. Time evolution of the secondary structural elements of the (A) wild type EpCAM and its mutants (A) EpCAM-WT, (B) D92V, (C) E137A, (D) Y186C, (E) Q204E, (F) N111K, (G) P84S and (H) Y215S.**
