# Supplementary material for: Landscape of cancer associated EpCAM mutations: molecular modeling, Predictive Insights and Impact on Patient Survival
Source: Research Square preprint supplement (doi:10.21203/rs.3.rs-6174915/v1), 2025-03-12
Supplement: Supplementary file 5 [file Figure S6.pdf › Figure S6.pdf]

Supplementary Figure 6.

## A. Lung Adenocarcinoma

GENIE Cohort v16.1

| Patient ID                                       | EpCAM          | Driver gene mutations                              |
|--------------------------------------------------|----------------|----------------------------------------------------|
| <a href="#">GENIE-PROV-fb936feb0e-40fc12cacf</a> | P178L          | TP53(R273H),PIK3CG(A557V),KEAP1(G332C)             |
| <a href="#">GENIE-MSK-P-0075350-T02-IM7</a>      | R126K          | KRAS(G12L), CTNNB1(E101D),MTOR(E1601K)             |
| <a href="#">GENIE-DFCI-200207-2455865*</a>       | E304K          | EGFR(L858R), TP53(R273S), MET(Amp)                 |
| <a href="#">GENIE-MSK-P-0011142-T01-IM5</a>      | L264P          | KRAS(G13D), TP53(A159P), NOTCH2(G1521W)            |
| <a href="#">GENIE-DFCI-148911-1525863*</a>       | Q204E          | BRAF(G464V),STK11(G242V),TP53(G245F)               |
| <a href="#">GENIE-MSK-P-0054440-T02-IM6</a>      | Y174C          | PRKCI(X473_splice), PTPRT(V609A)                   |
| <a href="#">GENIE-MSK-P-0016180-T01-IM6</a>      | A278V          | PIK3CA(H1047R), NF1(K2428*), TP53(E339*)           |
| <a href="#">GENIE-MSK-P-0093789-T01-IM7</a>      | N91S           | TP53(G266L),WT1(R380Q),NOTCH3(S1817L)              |
| <a href="#">GENIE-DFCI-037706-158964</a>         | Y215N          | ATM(R2832H), TP53(E285*), CDKN2A(E33*)             |
| <a href="#">GENIE-DFCI-052981-218952</a>         | D100G          | KRAS(G12C), PTEN(H93R), TP53(M237I)                |
| <a href="#">GENIE-MSK-P-0018327-T01-IM6</a>      | Q167L          | BRAF(V600E),TP53(Q104*), DNMT3A(R688L)             |
| <a href="#">GENIE-MSK-P-0019323-T01-IM6</a>      | Q246H          | BRAF(G469V), TP53(X225_splice), ERBB4(V87M)        |
| <a href="#">GENIE-MSK-P-0020779-T01-IM6</a>      | L148V          | KRAS(G12D),NOTCH2(A2178S),PIK3C2G(S526R)           |
| <a href="#">GENIE-MSK-P-0021387-T01-IM6*</a>     | L195V          | TP53(H179Tfs*7), AURKA(R137L), TERT(R428L)         |
| <a href="#">GENIE-PROV-b6f3feb09c-7b90e15fc3</a> | I272T          | KRAS(G12S),TP53(D208V),ABL2(R974*)                 |
| <a href="#">GENIE-UCSF-11973-8812T*</a>          | E223Q          | NRAS(Q61K),RAC1(D11E),ERBB2(Q398P),AXL(K567N)      |
| <a href="#">GENIE-MSK-P-0026043-T01-IM6</a>      | Q246E          | MET(H1094Y), TP53(R248L), DNMT3A(D702N)            |
| <a href="#">GENIE-MSK-P-0046101-T01-IM6</a>      | M73I           | TP53(E326*), ERBB4(L1259V), FOXL2(M149I)           |
| <a href="#">GENIE-MSK-P-0032035-T01-IM6</a>      | V212M          | KRAS(G12D),TP53(Y205F),KEAP1(N414I),NOTCH1(V47F)   |
| <a href="#">GENIE-DFCI-001194-3170353</a>        | R173H          | TP53(E68*), PRKDC(K1333*),CBL(P684S),RHOH(S152L)   |
| <a href="#">GENIE-MSK-P-0057134-T01-IM6</a>      | E301K          | TP53(E51*),DUSP4(R96C),SMARCA4(D1188Y)             |
| <a href="#">GENIE-DFCI-106474-805367</a>         | I288V          | KRAS(G12C),DNMT3A(R882H),TP53(R249S)               |
| <a href="#">GENIE-PROV-c262c39a54-b95d471997</a> | R163L          | MAP2K2(R313W),ATM(E1139D),CSF1R(A123G)             |
| <a href="#">GENIE-MSK-P-0033766-T01-IM6</a>      | A87S           | TP53(H179Y), ATM(A244T),FOXP1(S322*)               |
| <a href="#">GENIE-PROV-fba14a2091-f0188cb93f</a> | Q201E          | STK11(Q100*), CTNNB1(S37C), TP53(T150Hfs*20)       |
| <a href="#">GENIE-DFCI-124025-1251941</a>        | I209V          | TP53(N268I),RASA1(E763*),RICTOR(G71S),GATA3(A268S) |
| <a href="#">GENIE-DFCI-129774-1200816</a>        | K83E           | KRAS(T50I),TP53(R249M),ALK(S691R),ERBB3(E925Q)     |
| <a href="#">GENIE-DFCI-129774-1200816</a>        | D92V           | KRAS(G12C),STK11(X199_splice),IKBKE(L269M)         |
| <a href="#">GENIE-MSK-P-0041703-T01-IM6*</a>     | I181V          | KRAS(G12D),ATR(G1948V),SMAD4(D103N)                |
| <a href="#">GENIE-DFCI-084941-298944</a>         | I193V          | PIK3CA(E726K),MSH6(Q4*),NSD2(G67S)                 |
| <a href="#">GENIE-DFCI-183356-3502543</a>        | Q262E          | KRAS(G12V),FAT1(R3233C),TFE3(R134Q)                |
| <a href="#">GENIE-DFCI-216708-3103272</a>        | V268F          | TP53(V173L),PTPN11(L30F),NF1(X775_splice)          |
| <a href="#">GENIE-UCSF-230021-3307T</a>          | G112D          | EGFR(L858R), RET(R721W),ALK(T1087I)                |
| <a href="#">GENIE-MSK-P-0048098-T02-IM6</a>      | D158Y          | STK11(D53Gfs*12),KEAP1(G480W),JAK2(R215*)          |
| <a href="#">GENIE-UCSF-10655-3862T</a>           | Q204H          | TP53(E286Q),PTPRB(R874*),POLE(A2239V)              |
| <a href="#">GENIE-UCSF-10736-6951T*</a>          | L286Q          | KRAS(G12V),ATM(Y2437S),PTPRB(E1109D)               |
| <a href="#">GENIE-UCSF-10977-2282T</a>           | E298V          | TP53(N247I),SMAD3(R80W),ATR(Q1877E)                |
| <a href="#">GENIE-DFCI-269017-3531071*</a>       | D96N           | KRAS(G12D),TP53(Y163N),BRAF(G315*)                 |
| <a href="#">GENIE-MSK-P-0060172-T02-IM7*</a>     | V220A          | EGFR(E746_A750del),PIK3CA(H1047R)                  |
| <a href="#">GENIE-DFCI-387986-4648988</a>        | S159N          | ABCB11(M805I),KIF1B(L700del)                       |
| <a href="#">GENIE-DFCI-386840-4384366</a>        | M261T          | BRAF(V600E),TP53(Q167*),DNMT3A(W330*)              |
| <a href="#">GENIE-MSK-P-0064854-T01-IM7</a>      | S136F          | KRAS(G12V),CTNNB1(S33F),PIK3CG(E740D)              |
| <a href="#">GENIE-UCSF-14632-9666T</a>           | G237W          | EGFR(L858R),PIK3CA(H1047R),PDGFRA(G132V)           |
| <a href="#">GENIE-PROV-ae3f1d16fe-66eae2b26</a>  | S224C<br>S228F | ATR(L2076V),BCR(I1124V),PTCH1(R1391W)              |
| <a href="#">GENIE-PROV-5408feb7fb-c763276b13</a> | N189Y          | TP53(I251M),PIK3C2B(R1269H),DNMT3A(X803_splice)    |
| <a href="#">GENIE-PROV-77be8dc9d9-e2f89c4af8</a> | G112S          | KEAP1(Y491*),KIF5B(Q794E),PAK3(D518Y)              |
| <a href="#">GENIE-MSK-P-0068704-T01-IM7*</a>     | G245V          | EGFR(T790M, L858R), ERBB2(S310F),TGFB1(M441I)      |
| <a href="#">GENIE-PROV-f0235d7917-8cf0eda65c</a> | V276L          | KRAS(G12C),SMAD4(C363W),ERBB2(V308L),EGFR(K713T)   |
| <a href="#">GENIE-PROV-08026afdad-9e829531c7</a> | Y95H           | TP53(R248L),KEAP1(G186S),TGFB2(N144S)              |
| <a href="#">GENIE-UHN-OCT888181-ARC1</a>         | T172M          | KRAS(G12C),KEAP1(S275*),SMAD4(D493H)               |
| <a href="#">GENIE-MSK-P-0079689-T01-IM7</a>      | V275A          | TP53(X225_splice),STK11(E223*),MSH6(R495*)         |

Supplementary Figure 6.

**B. Lung Squamous Cell Carcinoma**

| Patient ID                                       | EpCAM | Driver gene mutations                          |
|--------------------------------------------------|-------|------------------------------------------------|
| <a href="#">GENIE-MSK-P-0041477-T01-IM6</a>      | E147* | TP53(Y163C), PIK3CA(R617W), JAK1(P209L)        |
| <a href="#">GENIE-PROV-c48e0e3e23-bd35a7bc78</a> | A165T | PIK3CA(E542K), TP53(S127F), CEBPA(T337S)       |
| <a href="#">GENIE-PROV-276782d53f-cf5d341df1</a> | Q246H | TP53(R175G), SMAD4(X436_splice), HGF(P180S)    |
| <a href="#">GENIE-PROV-9d17b4b1e8-5825c59136</a> | H150Q | TP53(M246V), PTEN(M35I), SMAD4(K50*)           |
| <a href="#">GENIE-PROV-aacf5ba00e-fa980c2072</a> | R173H | TP53(Q136*), FGFR2(P303R), SOX9(G305A)         |
| <a href="#">GENIE-MSK-P-0041617-T01-IM6</a>      | A16E  | KRAS(L19F), PIK3CA(E545K), TP53(L145Q)         |
| <a href="#">GENIE-UCSF-13402-0998T</a>           | I193V | TP53(R342*), KIT(V654M), ERBB4(C189*)          |
| <a href="#">GENIE-PROV-425b36f22f-86ee4cc590</a> | T17M  | TP53(R248P), ALK(P117R), INSR(D483N)           |
| <a href="#">GENIE-UCSF-783433-75291T</a>         | Y32N  | BRAF(V600E), TP53(R342*), FGFR2(L770V)         |
| <a href="#">GENIE-PROV-ea08758a92-14894cdd37</a> | A18P  | TP53(R342*), KEAP1(G379V), ALK(Y1359C)         |
| <a href="#">GENIE-DFCI-449876-4541134</a>        | G103W | TP53(E298*), ATM(L2519V), APC(P2392S)          |
| <a href="#">GENIE-MSK-P-0015934-T03-IM7</a>      | E217K | TP53(R249M), PIK3CA(C378R), NF1(L2348F)        |
| <a href="#">GENIE-PROV-7fcfb456a3-f0ad24f020</a> | E25V  | TP53(X224_splice), RET(K666N), PIK3CD(R641L)   |
| <a href="#">GENIE-DFCI-577479-5191985</a>        | R173L | HRAS(G13V), PTEN(T319*), BRCA2(X2985_splice)   |
| <a href="#">GENIE-UHN-OCT651159-ARC1</a>         | A2V   | TP53(R273L), NFE2L2(E79K), TPR(L742F)          |
| <a href="#">GENIE-PROV-80f21bed8e-971db6d694</a> | M305I | TP53(P278S), PIK3CA(P471A), FAT1(K1801*)       |
| <a href="#">GENIE-MSK-P-0082884-T01-IM7</a>      | E101V | TP53(G334V), RB1(S618*), ERBB4(C1106F)         |
| <a href="#">GENIE-PROV-72ea2b3530-7b9ad68680</a> | C27Y  | TP53(X10_splice), CDKN2A(D108Y), PRKDC(L3450*) |

**C.**

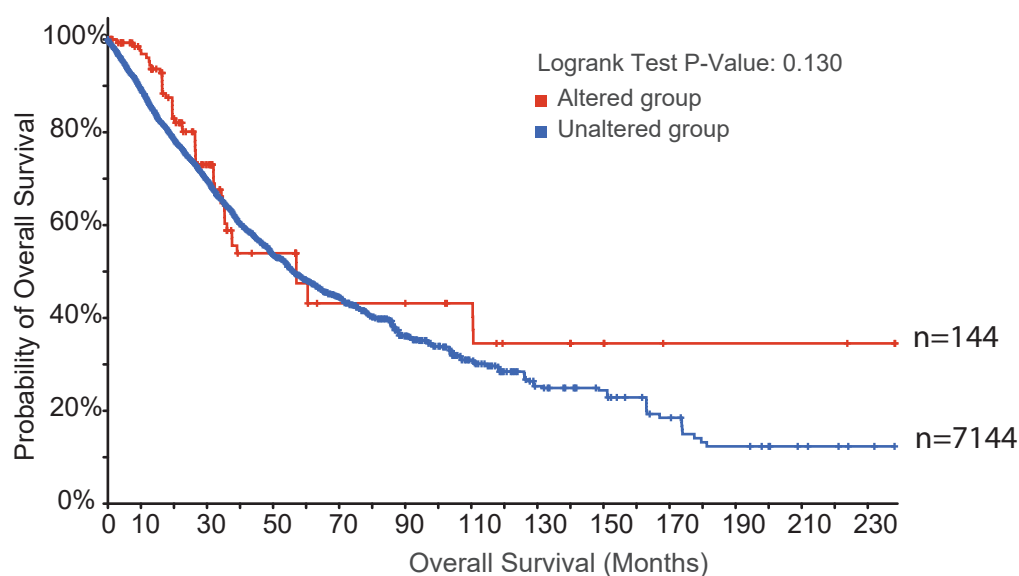

Altered group: Median month overall survival: 57.03

Unaltered group: Median month overall survival: 56.21

D. 76 EMT gene signature (NSCLC)

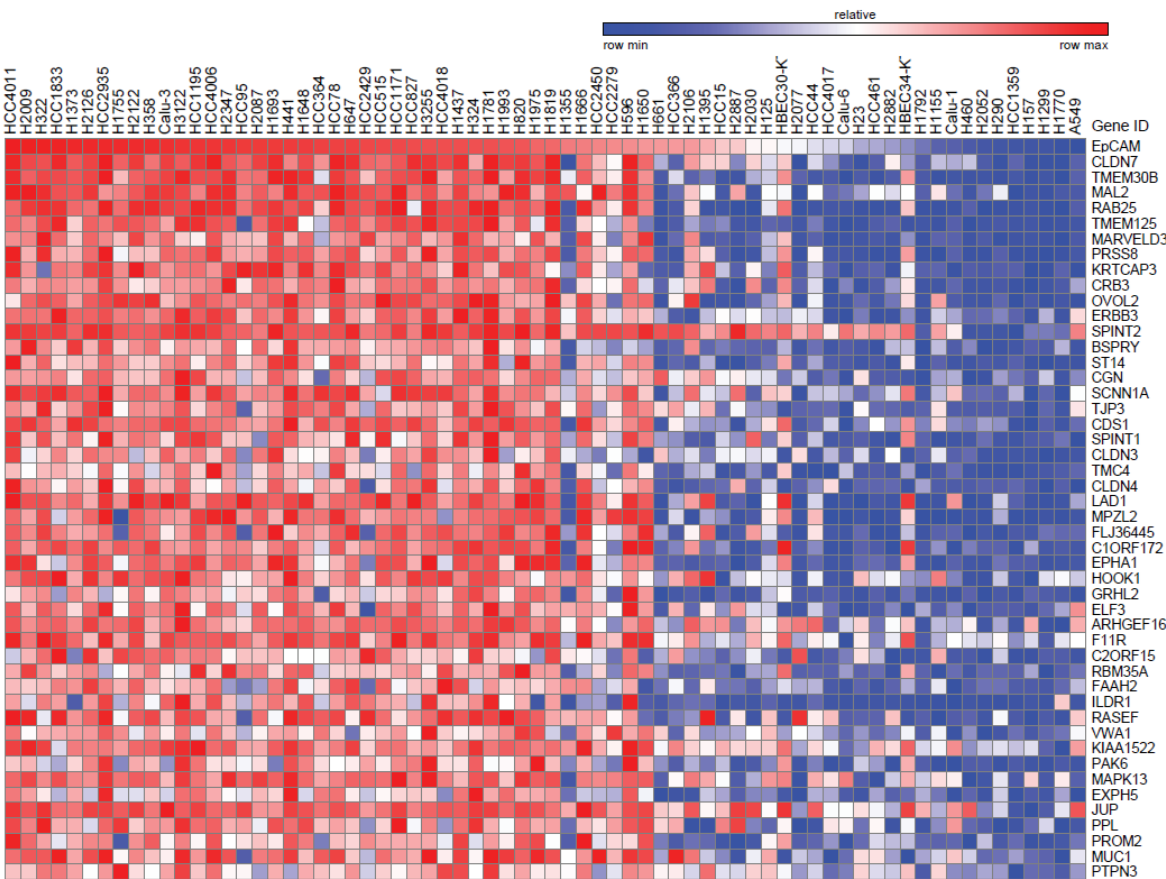

**Supplementary Figure 6. Somatic mutation of EpCAM in lung cancer, (A)** Mutations in adenocarcinoma, **(B)** squamous cell carcinoma. **(C)** Kaplan-Meier survival plot. **(D) 1.** 76-EMT gene signature, which designates cell types epithelial or mesenchymal, was used on dataset GSE32989 of 70 NSCLC lines. Heat plot shows that EpCAM expression is restricted to epithelial cell.
